# Supplementary material
Source: PubMed Central journal article supplement (PMC6459125)
Supplement: jamaneurol-76-454-s001.pdf [file jamaneurol-76-454-s001.pdf]

## Supplementary Online Content

Brander G, Isomura K, Chang Z, et al. Association of Tourette syndrome and chronic tic disorder with metabolic and cardiovascular disorders. *JAMA Neurol*. Published online January 14, 2019. doi:10.1001/jamaneurol.2018.4279

**eTable 1.** *International Classification of Diseases (ICD) Eighth (ICD-8; 1969-1986), Ninth (ICD-9; 1987-1996), and Tenth (ICD-10; 1997-2013) Revisions Codes From the Swedish National Patient Register for all Comorbidities in the Study*

**eTable 2.** *Correspondence Between the Harmonized Definition of the Metabolic Syndrome and the Selected Metabolic and Cardiovascular Disorders and Drug Prescriptions for Such Disorders Used as Proxy in the Current Study*

**eTable 3.** *Sensitivity Analysis – Risk of Metabolic and Cardiovascular Disorders in Individuals with Tourette Syndrome or Chronic Tic Disorder, Compared With Unaffected Individuals From the General Population, in a Subcohort of Individuals Followed Up From Birth*

**eTable 4.** *Frequencies of Comorbidities in Individuals With Tourette Syndrome or Chronic Tic Disorder and in the Unaffected General Population Cohort*

This supplementary material has been provided by the authors to give readers additional information about their work.

**eTable 1.** *International Classification of Diseases (ICD) Eighth (ICD-8; 1969-1986), Ninth (ICD-9; 1987-1996), and Tenth (ICD-10; 1997-2013) Revisions Codes From the Swedish National Patient Register for all Comorbidities in the Study*

| <b>Comorbidities</b>                            | <b><i>ICD-8</i></b>                    | <b><i>ICD-9</i></b>                | <b><i>ICD-10</i></b>                     |
|-------------------------------------------------|----------------------------------------|------------------------------------|------------------------------------------|
| <b>Organic disorders</b>                        |                                        |                                    |                                          |
| Organic brain disorder                          | 290, 292, 293, 294                     | 290, 293, 294                      | F0                                       |
| Epilepsy                                        | 345                                    | 345                                | G40                                      |
| <b>Obsessive-Compulsive Disorder</b>            | 300.3                                  | 300D                               | F42                                      |
| <b>Attention-Deficit/Hyperactivity Disorder</b> | –                                      | 314                                | F90                                      |
| <b>Conduct disorders</b>                        | –                                      | 312                                | F91                                      |
| <b>Pervasive developmental disorders</b>        | –                                      | 299A                               | F84.0, F84.1, F84.5, F84.8, F84.9        |
| <b>Psychotic disorders</b>                      | 291, 295, 296.99, 297, 298, 299        | 291, 292, 295, 296X, 297, 298, 299 | F20-F25, F28, F29, F32.3, x.5 in F10-F19 |
| <b>Bipolar disorders</b>                        | 296.00, 296.10, 296.30, 296.88, 296.99 | 296A, 296C, 296E, 296W, 296X       | F30-F31                                  |
| <b>Anxiety disorders</b>                        | 300.0, 300.2                           | 300A, 300C, 308, 309               | F40, F41, F43                            |
| <b>Mood disorders*</b>                          | 296.2, 300.4                           | 296B, 300E, 311                    | F32-F39, except F32.3                    |

\* Except for manic episodes and bipolar disorders.

**eTable 2.** Correspondence Between the Harmonized Definition of the Metabolic Syndrome<sup>1</sup> and the Selected Metabolic and Cardiovascular Disorders and Drug Prescriptions for Such Disorders Used as Proxy in the Current Study

| Criteria for clinical diagnosis of the metabolic syndrome <sup>1</sup>                                                                                                                                         |                                                                  | Metabolic and cardiovascular disorders from the Swedish National Patient Register              | Drug prescriptions for metabolic and cardiovascular disorders from the Swedish Prescribed Drug Register                                                                                                                                                                                                |
|----------------------------------------------------------------------------------------------------------------------------------------------------------------------------------------------------------------|------------------------------------------------------------------|------------------------------------------------------------------------------------------------|--------------------------------------------------------------------------------------------------------------------------------------------------------------------------------------------------------------------------------------------------------------------------------------------------------|
| Measure                                                                                                                                                                                                        | Categorical cut points                                           |                                                                                                |                                                                                                                                                                                                                                                                                                        |
| Elevated waist circumference [it is recommended that the IDF cut points be used for non-Europeans and either the IDF or AHA/NHLBI cut points used for people of European origin until more data are available] | Population- and country-specific definitions                     | Obesity [ICD-8 code 277; ICD-9 codes 278.0/.1; ICD-10 code E66]                                | –                                                                                                                                                                                                                                                                                                      |
| Elevated triglycerides (drug treatment for elevated triglycerides is an alternate indicator)                                                                                                                   | ≥150 mg/dL (1.7 mmol/L)                                          | –                                                                                              | Lipid modifying agents, plain [ATC code C10A]                                                                                                                                                                                                                                                          |
| Reduced HDL-C (drug treatment for reduced HDL-C is an alternate indicator)                                                                                                                                     | <40 mg/dL (1.0 mmol/L) in males; <50 mg/dL (1.3 mmol/L) in males | –                                                                                              | Lipid modifying agents, plain [ATC code C10A]                                                                                                                                                                                                                                                          |
| Elevated blood pressure (antihypertensive drug treatment in a patient with a history of hypertension is an alternate indicator)                                                                                | Systolic ≥130 and/or diastolic ≥85 mm Hg                         | Hypertension [ICD-8 codes 400-404; ICD-9 codes 401-405; ICD-10 codes I10-15]                   | Antihypertensives [ATC code C02], except for clonidine (ATC code C02AC01) and guanfacine (ATC code C02AC02) <sup>2</sup><br>Diuretics [ATC code C03]<br>Beta blocking agents [ATC code C07]<br>Calcium channel blockers [ATC code C08]<br>Agents acting on the renin-angiotensin system [ATC code C09] |
| Elevated fasting glucose [most patients with type 2 diabetes mellitus will have the metabolic syndrome by the proposed criteria] (drug treatment of elevated                                                   | ≥100 mg/dL                                                       | Type 2 diabetes mellitus [ICD-10 code E11], but not type 1 diabetes mellitus [ICD-10 code E10] | Blood glucose lowering drugs, excluding insulins [ATC code A10B], but not Insulins and analogues [ATC code A10A]                                                                                                                                                                                       |

| glucose is an alternate indicator) |   |                                                                                                                                                                                                                                                                                                                                                                                             |                                                                                                                                                                                                                                                                                                                              |
|------------------------------------|---|---------------------------------------------------------------------------------------------------------------------------------------------------------------------------------------------------------------------------------------------------------------------------------------------------------------------------------------------------------------------------------------------|------------------------------------------------------------------------------------------------------------------------------------------------------------------------------------------------------------------------------------------------------------------------------------------------------------------------------|
| –                                  | – | Ischemic heart diseases [ICD-8 codes 410-414; ICD-9 codes 411-414; ICD-10 codes I20-25]<br>Arrhythmia [ICD-8 codes 427-429; ICD-9 codes 426-429; ICD-10 codes I44-49]<br>Cerebrovascular diseases and transient ischemic attack [ICD-8 codes 430-438; ICD-9 codes 430-437; ICD-10 codes I60-66 and G45]<br>Arteriosclerosis [ICD-8 codes 440-444; ICD-9 codes 440-444; ICD-10 codes I70-74] | Cardiac therapy [ATC code C01]<br>Antihypertensives [ATC code C02]<br>Diuretics [ATC code C03]<br>Peripheral vasodilators [ATC code C04]<br>Vasoprotectives [ATC code C05]<br>Beta blocking agents [ATC code C07]<br>Calcium channel blockers [ATC code C08]<br>Agents acting on the renin-angiotensin system [ATC code C09] |

<sup>1</sup>Harmonized definition of the metabolic syndrome from the joint interim statement of the International Diabetes Federation Task Force on Epidemiology and Prevention, the National Heart, Lung, and Blood Institute; the American Heart Association; the World Heart Federation; the International Atherosclerosis Society; and the International Association for the Study of Obesity (Alberti et al., 2009 *Circulation*).

<sup>2</sup>Clonidine and guanfacine are excluded as outcomes since they are indicated and increasingly used for the treatment of tic disorders.

*Abbreviations:* AHA/NHLBI American Heart Association/National Heart, Lung, and Blood Institute; ATC Anatomical Therapeutic Chemical Classification System; HDL-C High-Density Lipoprotein Cholesterol; ICD International Classification of Diseases; IDF International Diabetes Federation.

**eTable 3.** Sensitivity Analysis – Risk of Metabolic and Cardiovascular Disorders in Individuals with Tourette Syndrome or Chronic Tic Disorder, Compared With Unaffected Individuals From the General Population, in a Subcohort of Individuals Followed Up From Birth

|                                               | Tourette Syndrome or Chronic Tic Disorder cohort (n=6,245) |          | Unaffected general population (n=4,244,718) |          | HR (95% CI)<br><i>Adjusted for sex and birth year</i> |
|-----------------------------------------------|------------------------------------------------------------|----------|---------------------------------------------|----------|-------------------------------------------------------|
|                                               | <i>n</i>                                                   | <i>%</i> | <i>n</i>                                    | <i>%</i> |                                                       |
| <i>Metabolic and cardiovascular disorders</i> |                                                            |          |                                             |          |                                                       |
| Any disorder                                  | 949                                                        | 15.20    | 369,688                                     | 8.71     | <b>2.06 (1.93-2.19)</b>                               |
| Obesity                                       | 264                                                        | 4.23     | 66,175                                      | 1.56     | <b>2.88 (2.55-3.25)</b>                               |
| Dyslipidemia                                  | 24                                                         | 0.38     | 14,261                                      | 0.34     | <b>1.58 (1.06-2.36)</b>                               |
| Type 2 diabetes mellitus                      | 87                                                         | 1.39     | 29,910                                      | 0.70     | <b>1.85 (1.50-2.29)</b>                               |
| Circulatory system diseases                   | 690                                                        | 11.05    | 296,171                                     | 6.98     | <b>1.95 (1.81-2.10)</b>                               |

*Note:* Statistically significant hazard ratios are highlighted in bold.

*Abbreviations:* CI confidence interval, HR hazard ratio.

**eTable 4.** Frequencies of Comorbidities in Individuals With Tourette Syndrome or Chronic Tic Disorder and in the Unaffected General Population Cohort

|                                                         | Tourette Syndrome or Chronic Tic Disorder cohort (n=7,804) |       | Unaffected general population (n=14,037,222) |      |
|---------------------------------------------------------|------------------------------------------------------------|-------|----------------------------------------------|------|
|                                                         | <i>n</i>                                                   | %     | <i>n</i>                                     | %    |
| <i>Comorbidities</i>                                    |                                                            |       |                                              |      |
| Organic disorders (organic brain disorder and epilepsy) | 507                                                        | 6.50  | 663,950                                      | 4.73 |
| Obsessive-Compulsive Disorder                           | 1,353                                                      | 17.34 | 35,760                                       | 0.25 |
| Attention-Deficit/Hyperactivity Disorder                | 3,677                                                      | 47.12 | 110,920                                      | 0.79 |
| Conduct Disorder                                        | 558                                                        | 7.15  | 11,790                                       | 0.08 |
| Pervasive Developmental Disorders                       | 2,006                                                      | 25.70 | 51,516                                       | 0.37 |
| Psychosis + Bipolar Disorder                            | 823                                                        | 10.55 | 316,698                                      | 2.26 |
| Anxiety Disorders                                       | 1,964                                                      | 25.17 | 550,021                                      | 3.92 |
| Mood Disorders*                                         | 1,569                                                      | 20.11 | 597,159                                      | 4.25 |

\* Except for manic episodes and bipolar disorders.
